# Supplementary material
Source: bioRxiv or medRxiv preprint supplement (https://www.biorxiv.org/highwire/filestream/108521/field_highwire_adjunct_files/7/358622-7.pdf)

**A**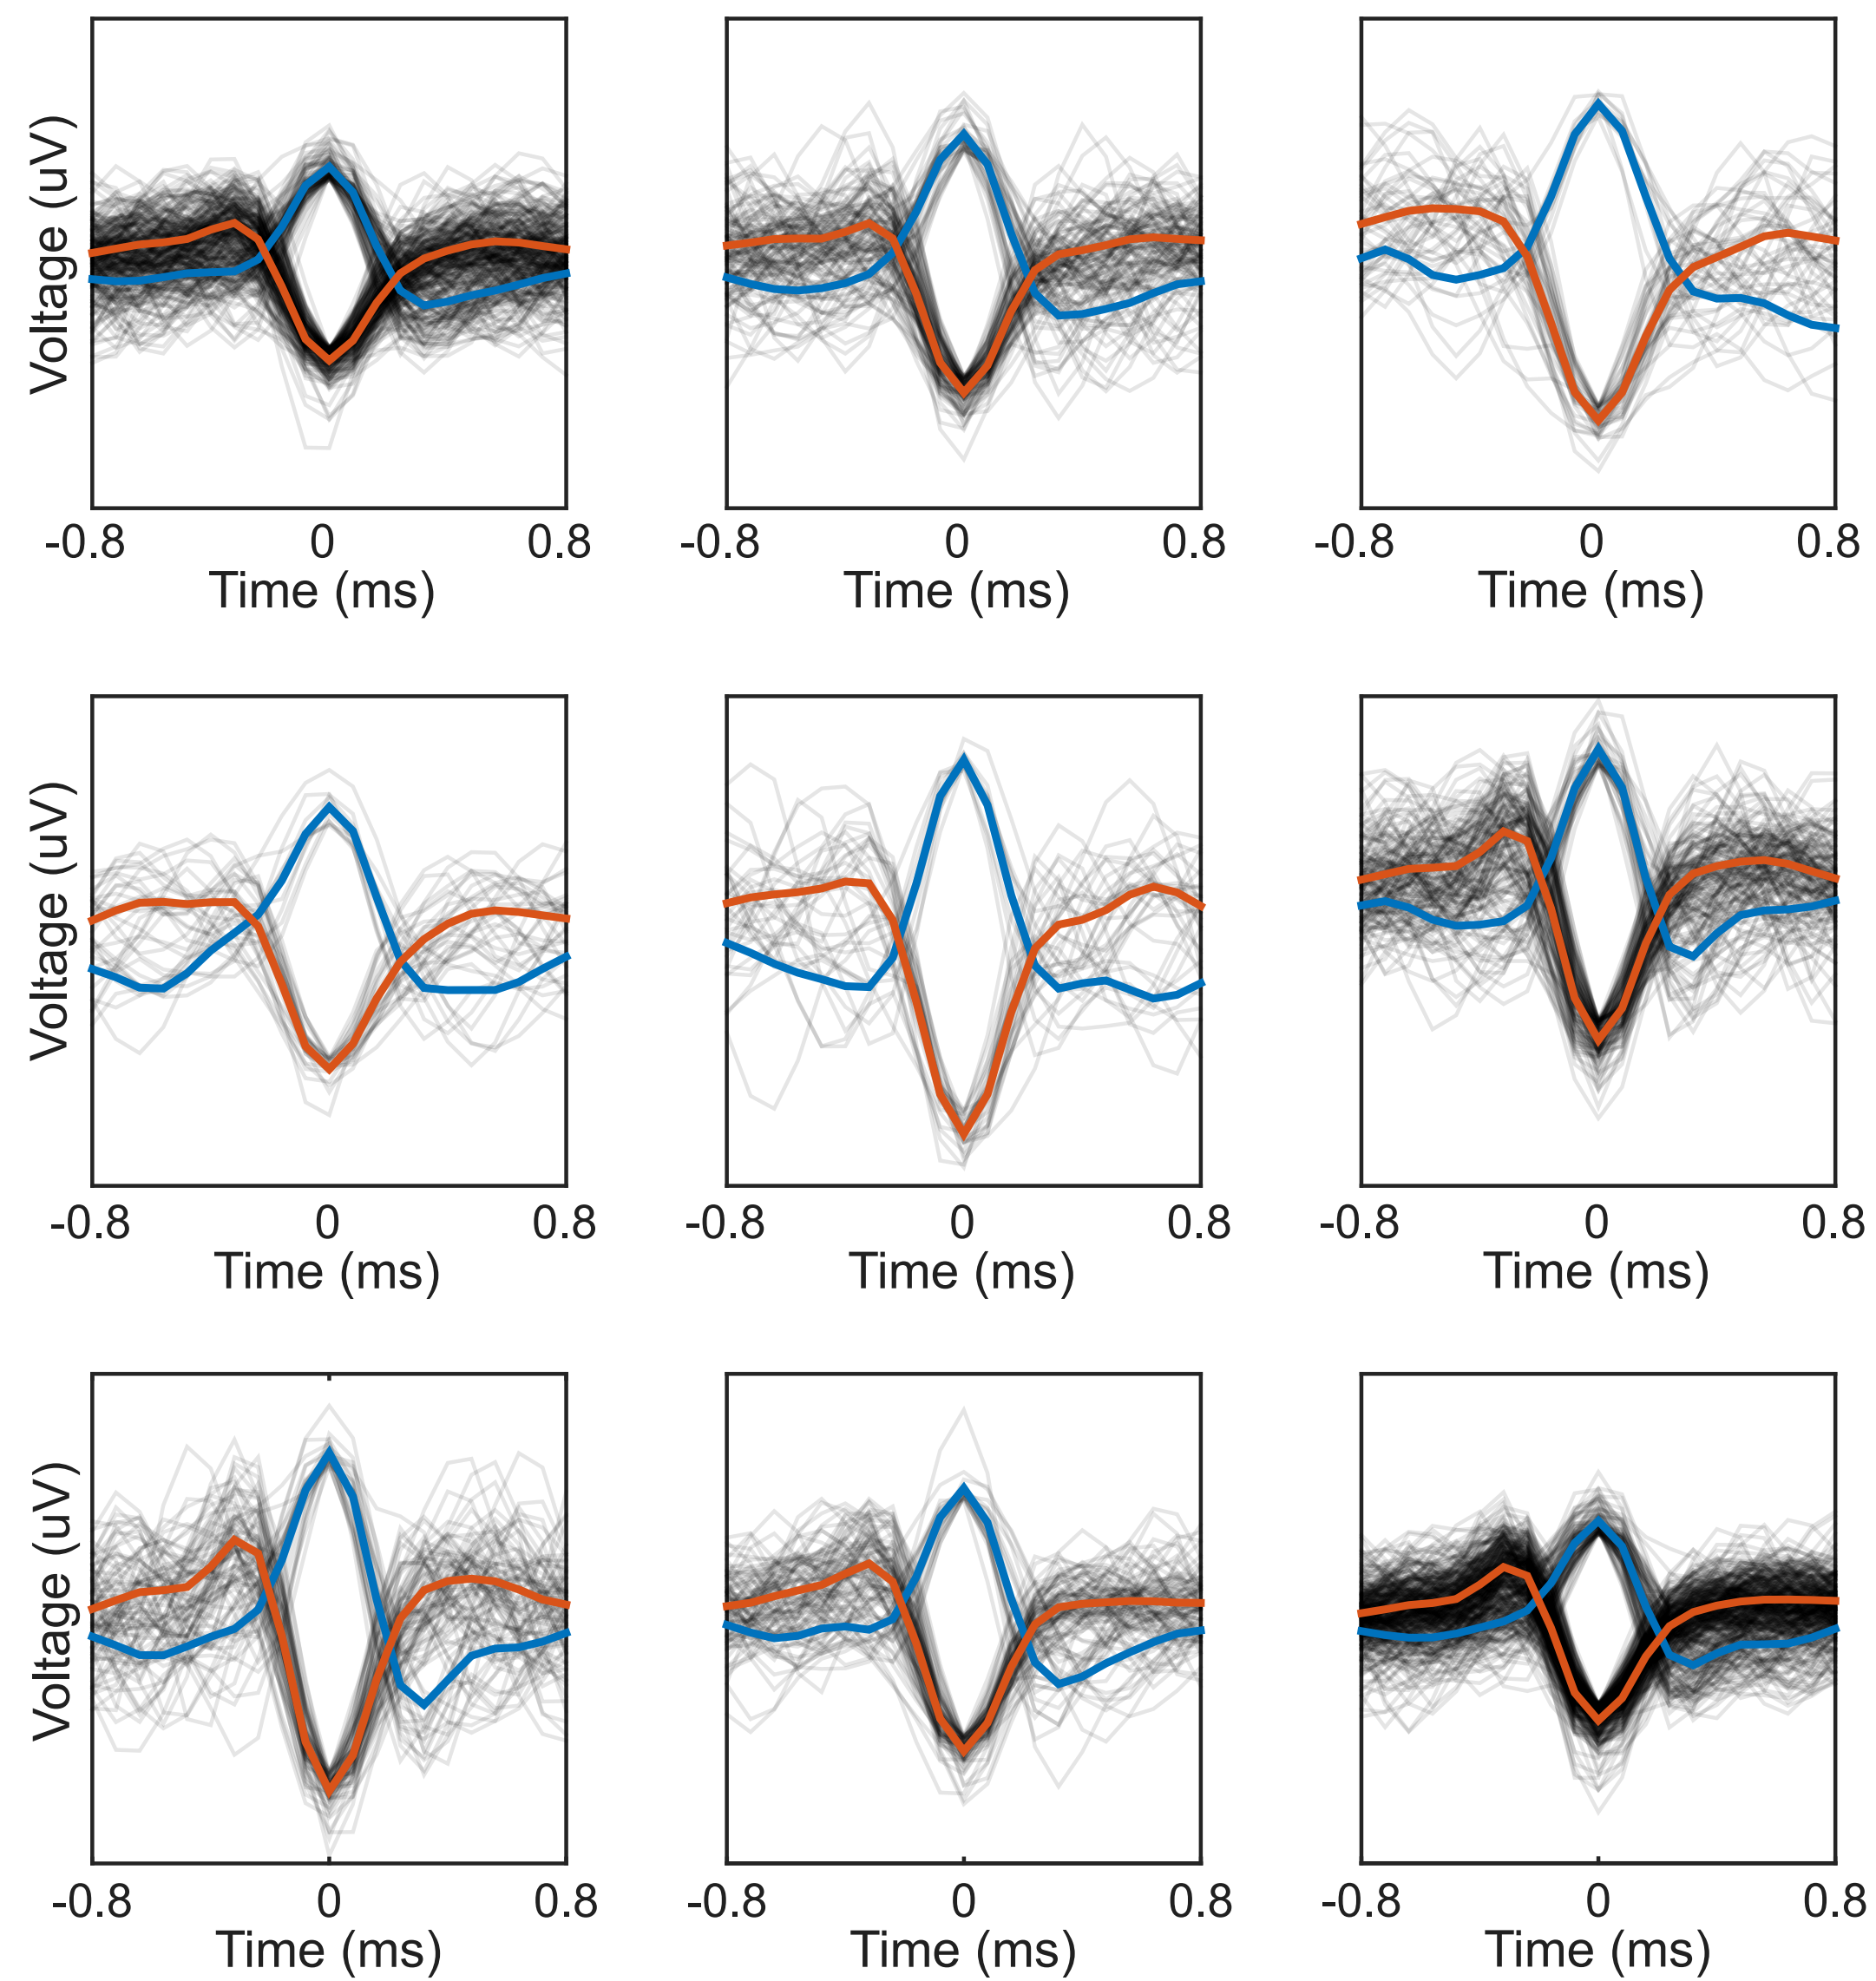**B****Pop. Spiking Kernel**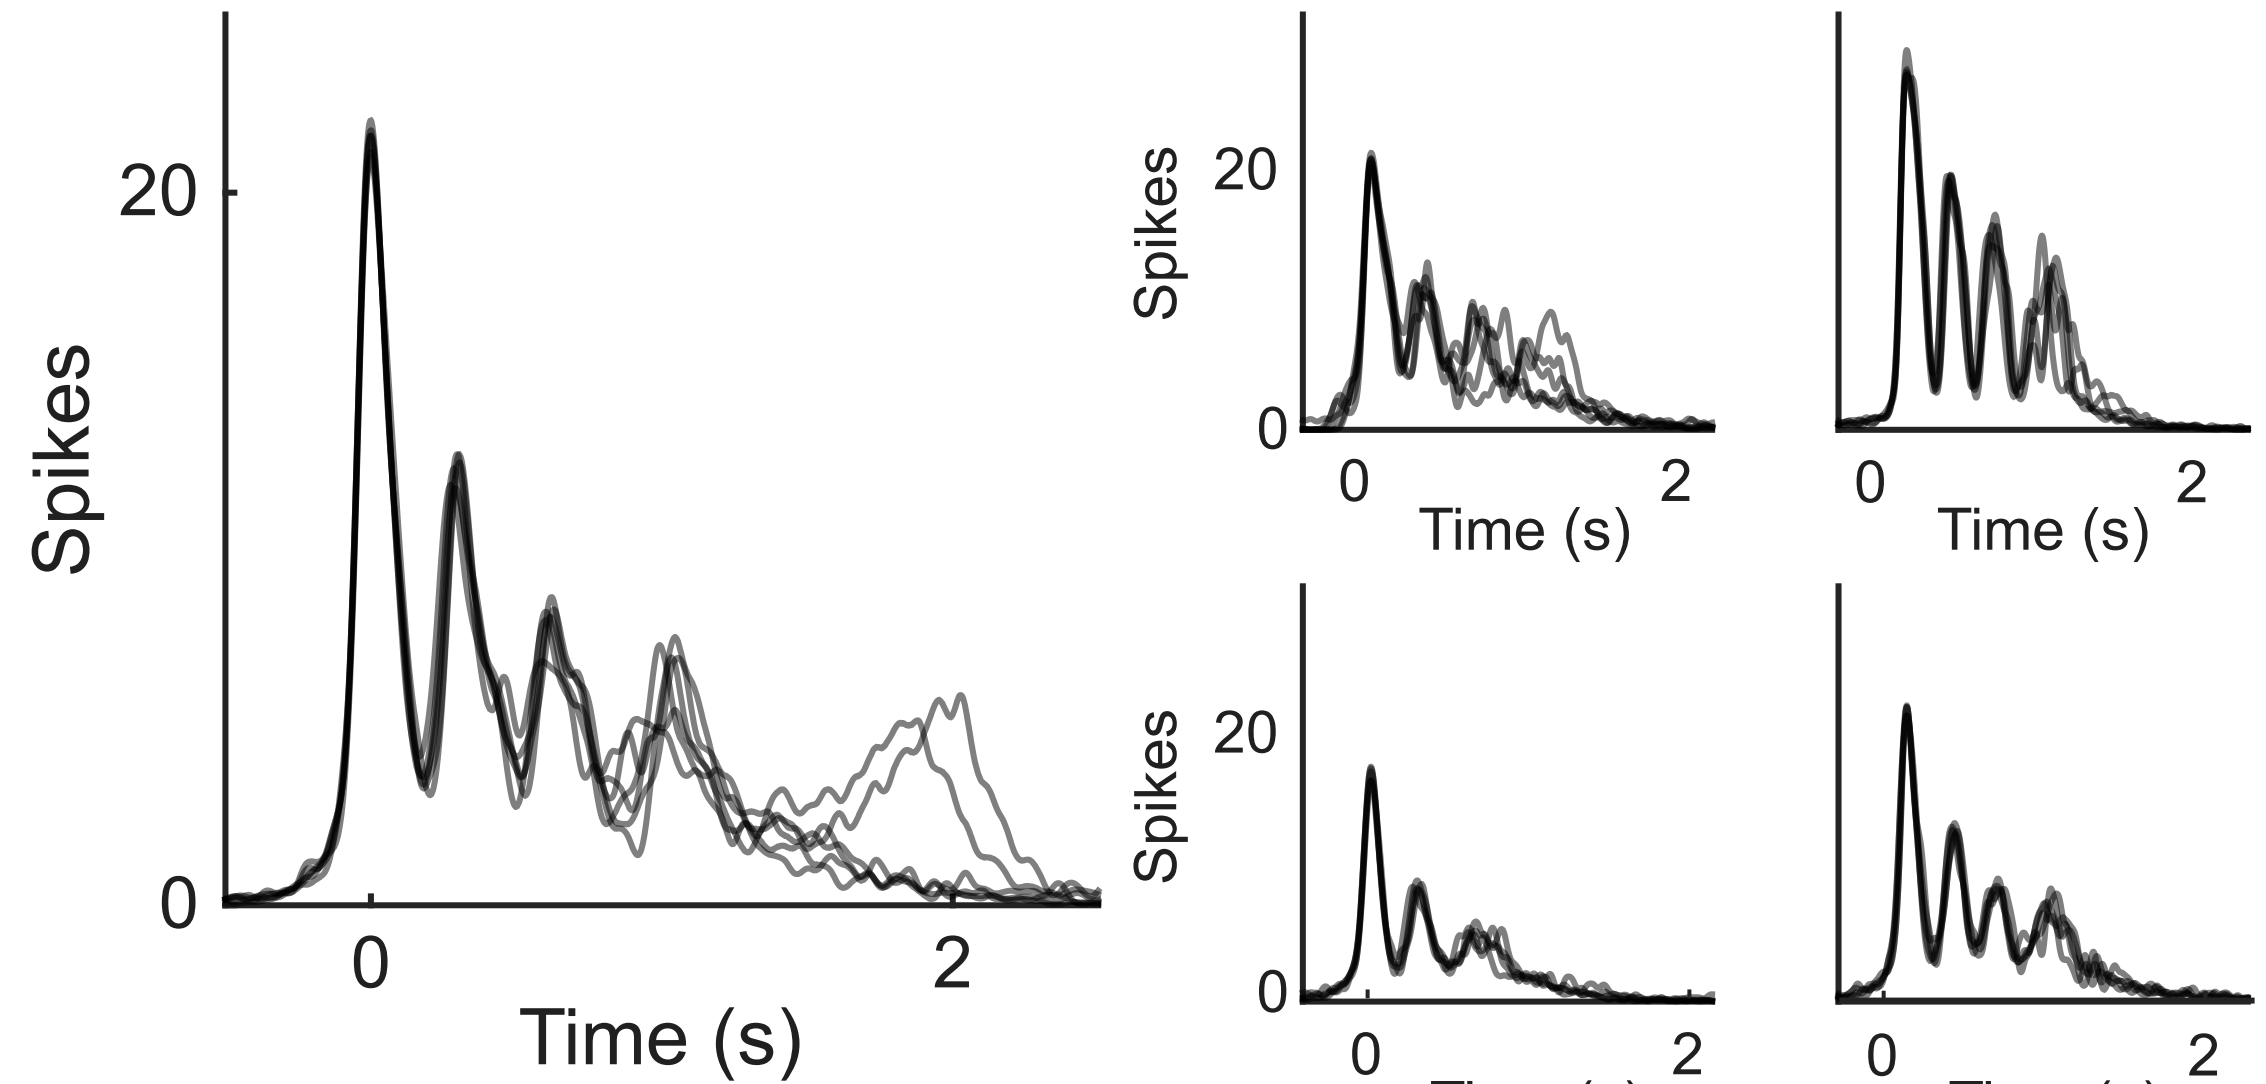**LFP Kernel**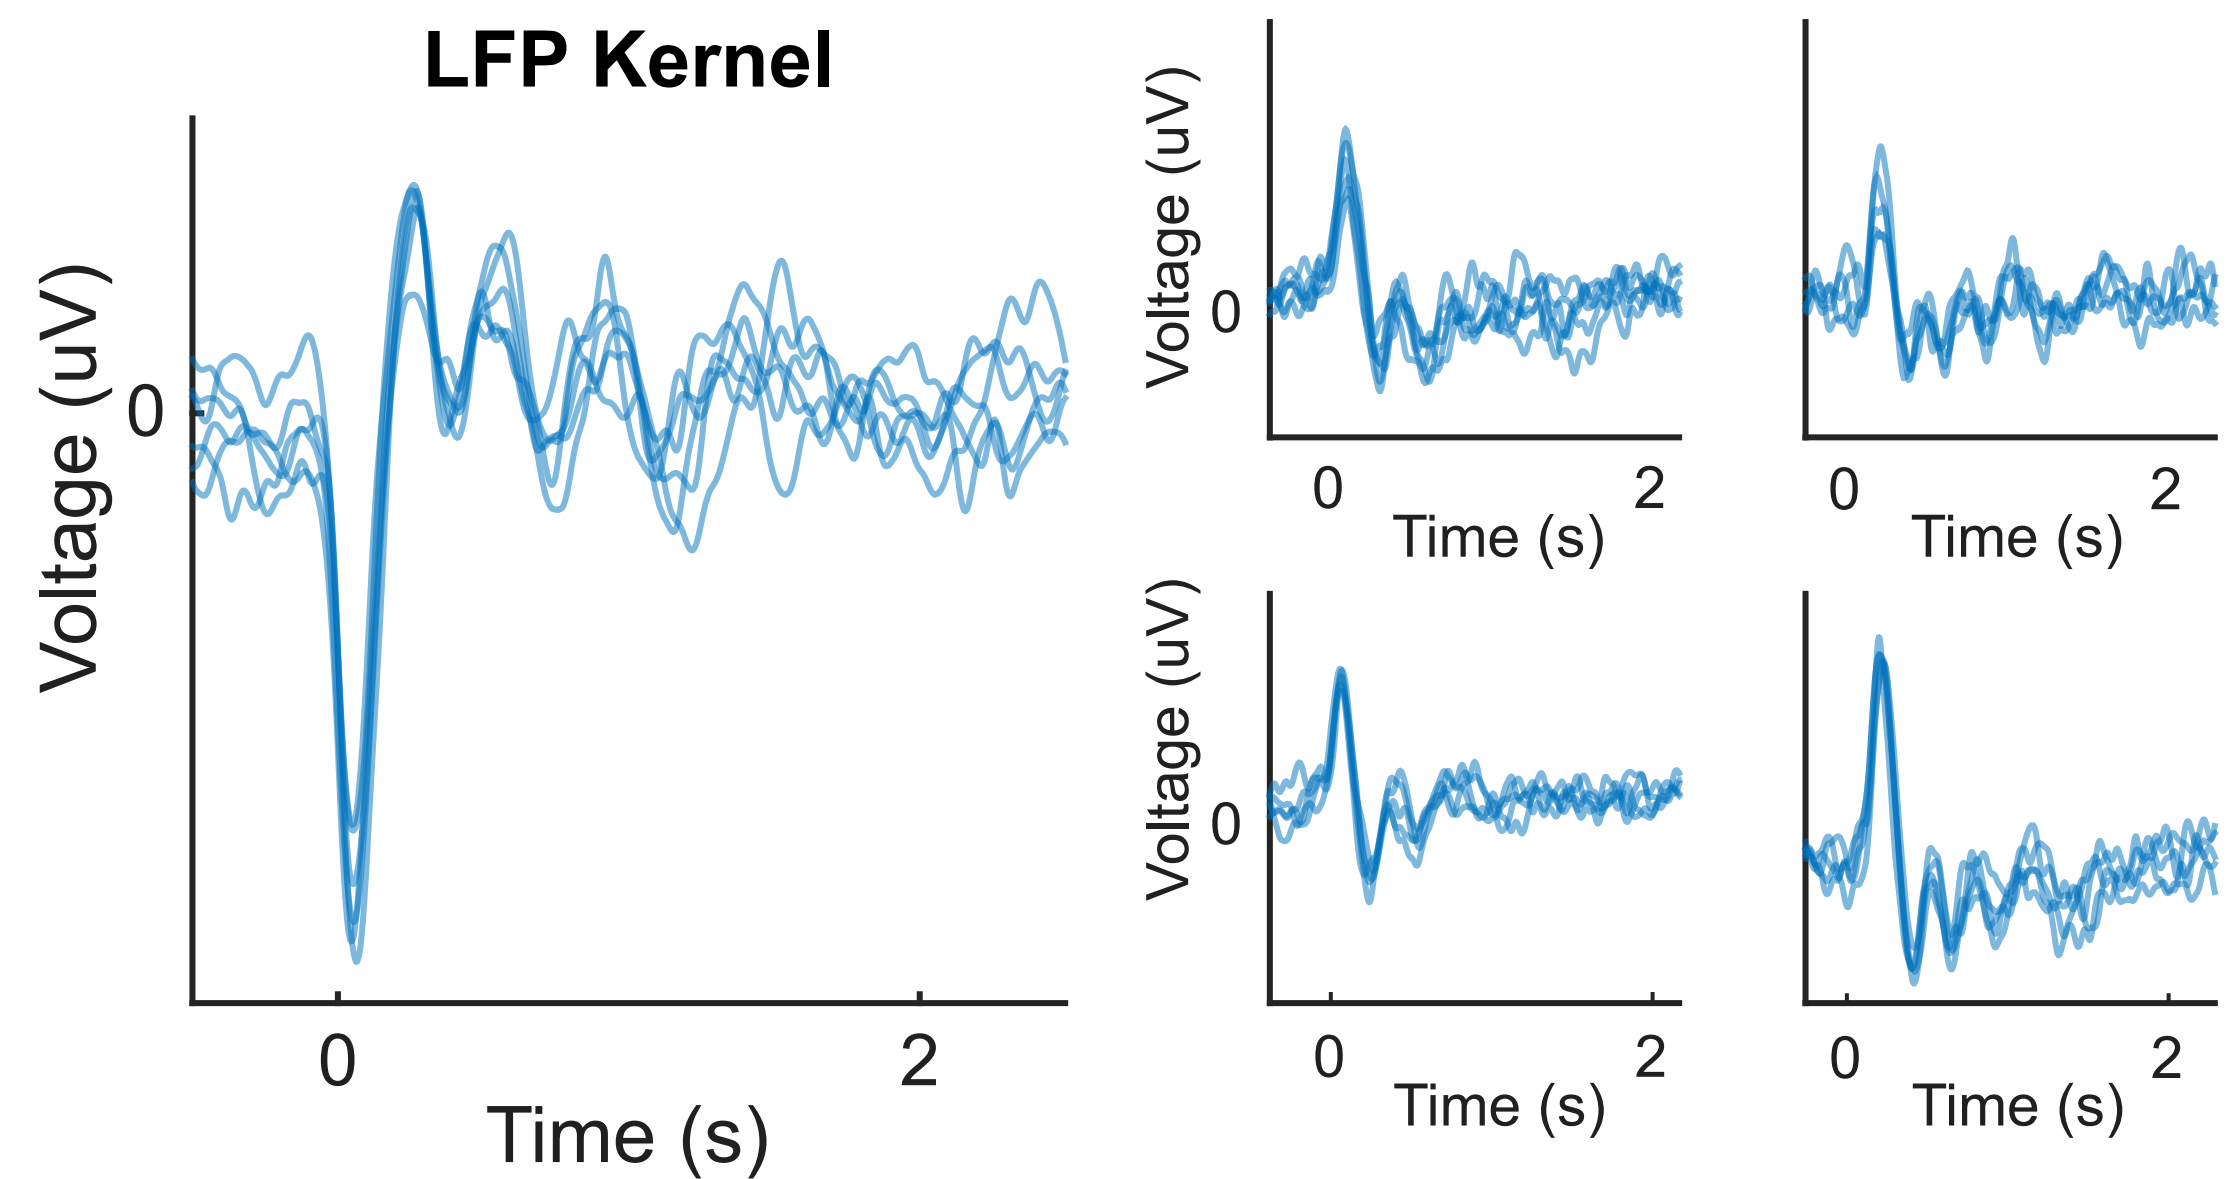**C**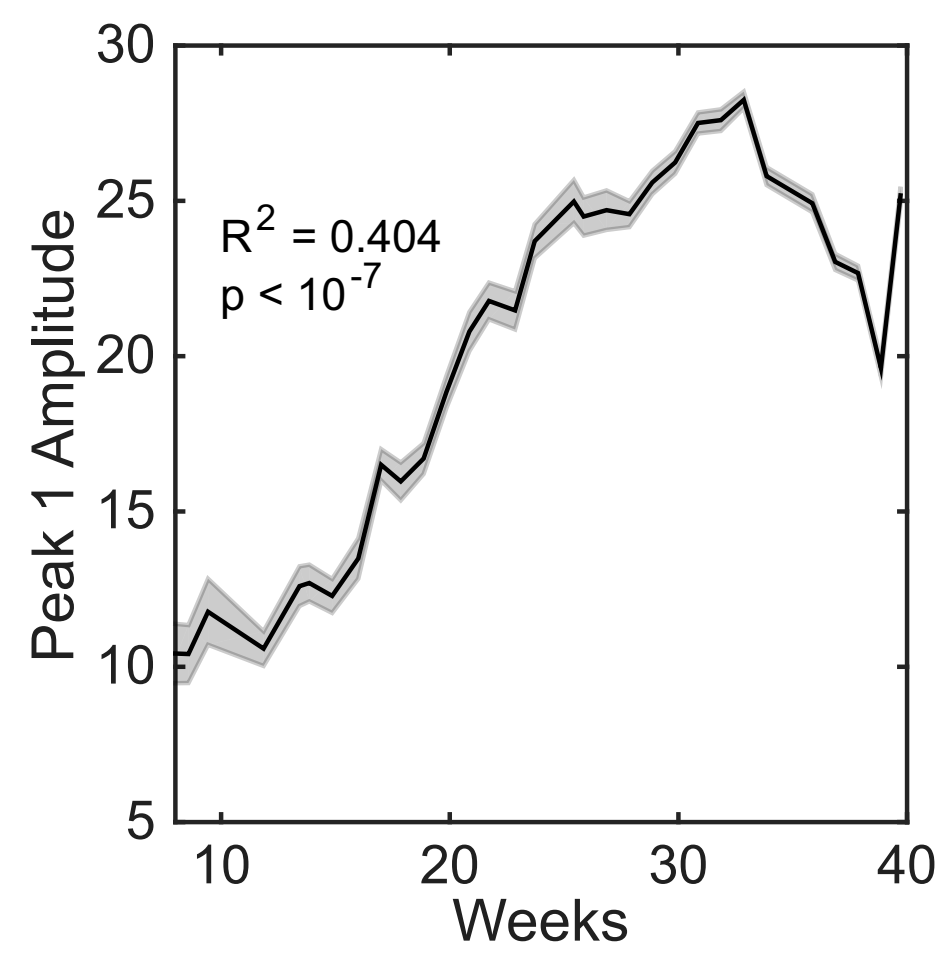**D**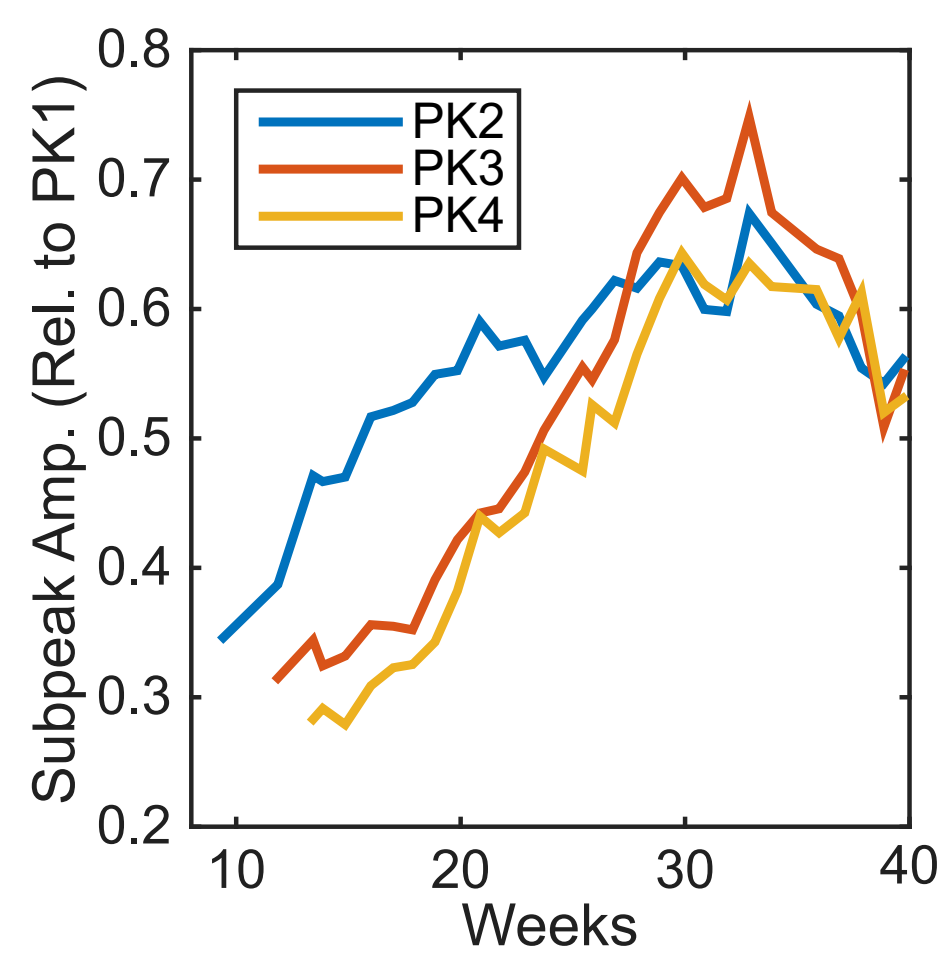**E**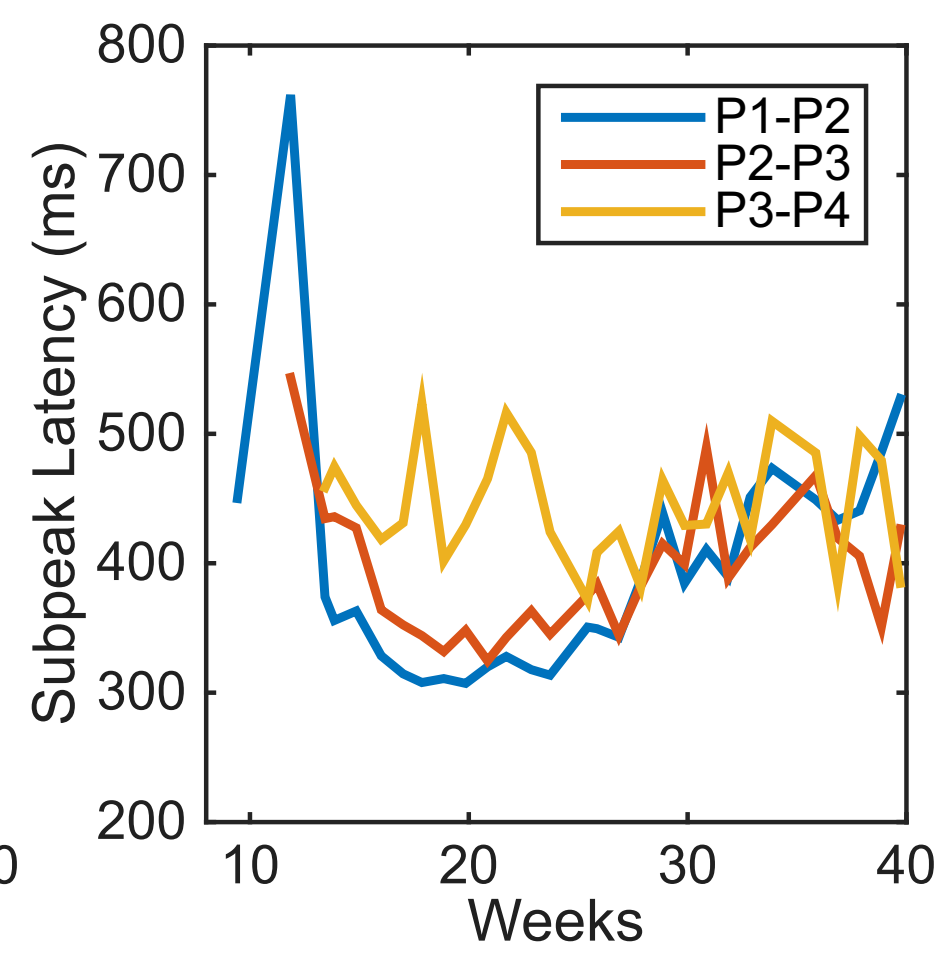**F**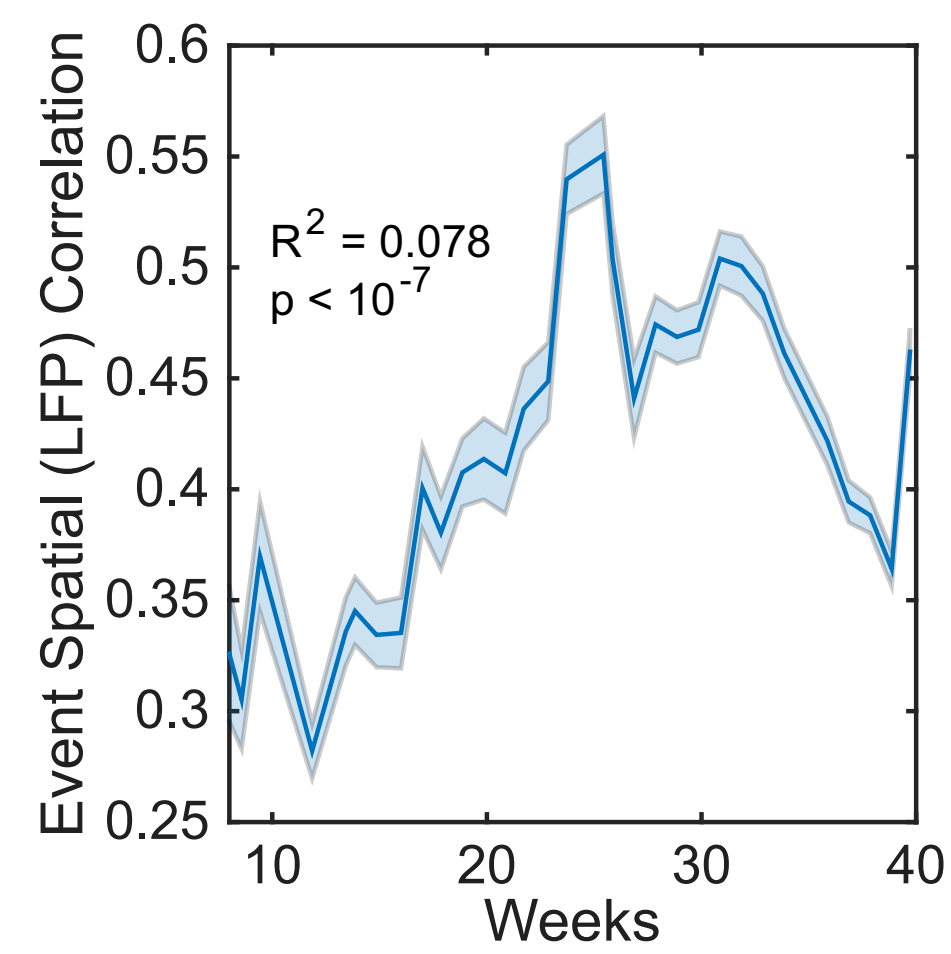**G**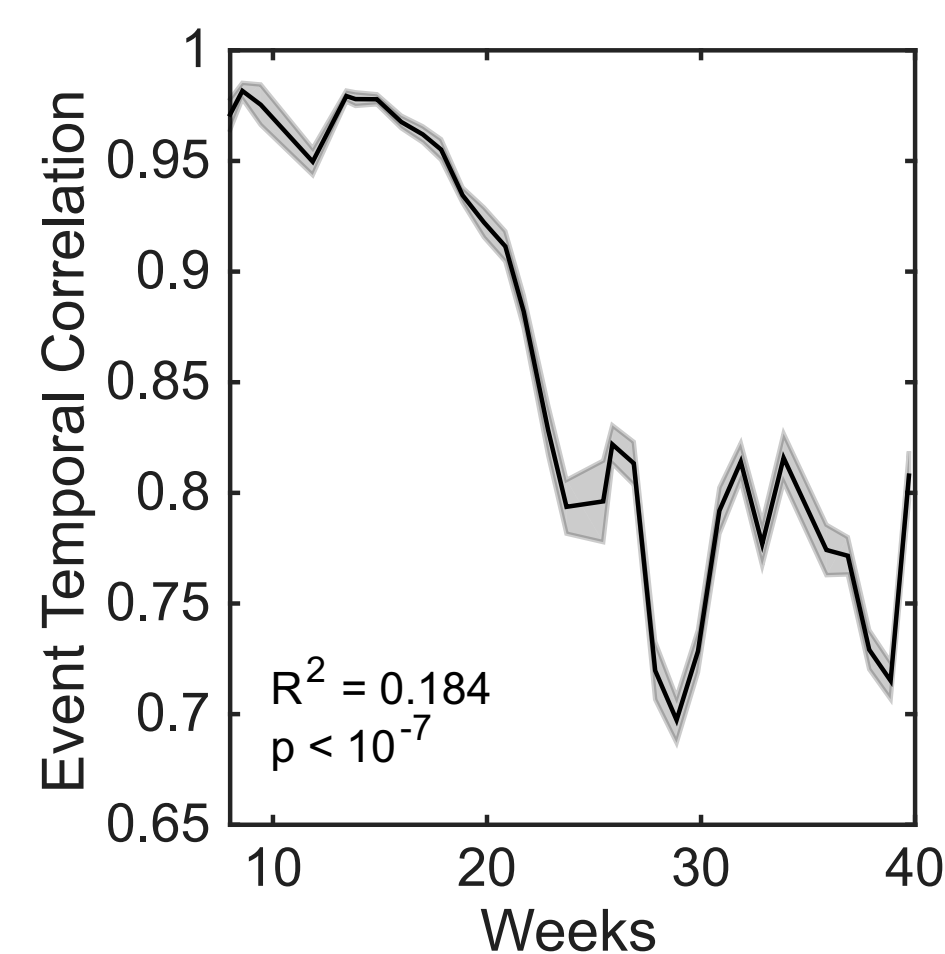

Supplement: Supplementary file [file 358622-7.pdf]
